# Supplementary material
Source: Springer Nature journal article supplement (https://www.springermedizin.de/resource/supplementary/12904_2007_39_MOESM2_ESM.pdf/9518004)
Supplement: MOESM2 [file 9518004]

| Time line                        | Fast track (immediate referral to palliative care service) | Best standard care (wait list control) |
|----------------------------------|------------------------------------------------------------|----------------------------------------|
| Consent and Baseline Interview   | (a)                                                        |                                        |
| Randomisation                    |                                                            |                                        |
| 48 hours                         | B                                                          |                                        |
| 1-6 weeks                        | C                                                          |                                        |
| 6 weeks                          | (d)                                                        | (d)                                    |
| 6-12 weeks                       | E                                                          |                                        |
| 12 weeks                         | (f)                                                        | (f)                                    |
| 48 hours after 12 week interview |                                                            | G                                      |
| 12-18 weeks                      | H                                                          | I                                      |
| 18 weeks                         |                                                            | (j)                                    |
| 19-24 weeks                      |                                                            | K                                      |
| 24-26 weeks                      | (l)                                                        | (l)                                    |

|     |                                                                                                                                                |
|-----|------------------------------------------------------------------------------------------------------------------------------------------------|
| (a) | Baseline research interview and consent on entry to the study before randomisation                                                             |
| B   | Palliative care assessment within 48 hours                                                                                                     |
| C   | Palliative care team care, including assessment, treatment, referral                                                                           |
| (d) | Research interview at 6 weeks after randomisation                                                                                              |
| E   | Palliative care team care continues usually ending by 12 weeks, with referral on for those patients needing long term care                     |
| (f) | Research interview at 12 weeks after randomisation                                                                                             |
| G   | Standard care group now offered palliative care team who see person within 48 hours of receiving information                                   |
| H   | Patients now discharged from palliative care team, if have been referred on some under care of community team, which continues from this point |
| I   | Palliative care team now providing care in standard care group, following their 12 week wait                                                   |
| (j) | Research interview at 18 weeks, only for best standard care group, now 4-6 weeks after they have received the team care                        |
| K   | Palliative care team continues to support standard intervention group                                                                          |
| (l) | Final research interview, 24-26 weeks after randomisation                                                                                      |
